# Supplementary material for: Construction of two novel non-penetrating Co-MOFs derived from designed 2,4,6-tri(2,4-dicarboxyphenyl)pyridine: synthesis, structure and gas adsorption properties
Source: Royal Society of Chemistry journal article supplement (doi:10.1039/d2ce00553k), 2022-01-01
Supplement: d2ce00553k1.pdf [file d2ce00553k1.pdf]

Electronic Supporting Information

# Construction of two novel non-penetrating Co-MOFs derived from designed 2,4,6-tri(2,4-dicarboxyphenyl)pyridine: synthesis, structure and gas adsorption properties

Tao Ding,<sup>\*a</sup> Zi-Yu Li,<sup>a</sup> Dan Gao,<sup>a</sup> Li-Na Zheng,<sup>a</sup> Lan-Ting Shi,<sup>a</sup> Xue-Song Gong,<sup>a</sup> and Zi-Wei Gao<sup>\*b</sup>

<sup>a</sup>*School of Environmental and Chemical Engineering, Xi'an Polytechnic University, Xi'an 710048, P. R China.*

<sup>b</sup>*Key Laboratory of Applied Surface and Colloid Chemistry, Ministry of Education, School of Chemistry & Chemical Engineering, Shaanxi Normal University, Xi'an 710062, P. R China*

**Table S1.** Selected Bond Length (Å) and Angles (°) for Co-MOF 1-2

| <b>Co-MOF 1</b>                                                                                                                                        |           |                     |            |
|--------------------------------------------------------------------------------------------------------------------------------------------------------|-----------|---------------------|------------|
| Co(1)-O(5)#1                                                                                                                                           | 2.020(4)  | Co(1)-O(1)          | 1.970(5)   |
| Co(1)-O(5)#2                                                                                                                                           | 2.020(4)  | Co(2)-O(8)#3        | 1.935(4)   |
| Co(1)-O(7)#3                                                                                                                                           | 2.068(5)  | Co(2)-O(8)#4        | 1.935(4)   |
| Co(1)-O(7)#4                                                                                                                                           | 2.068(5)  | Co(2)-O(2)          | 1.923(5)   |
| O(5)#1-Co(1)-O(5)#2                                                                                                                                    | 89.8(3)   | O(1)-Co(1)-O(7)#4   | 103.3(2)   |
| O(7)#4-Co(1)-O(7)#3                                                                                                                                    | 91.2(4)   | O(8)#3-Co(2)-O(8)#4 | 114.8(3)   |
| O(1)-Co(1)-O(5)#2                                                                                                                                      | 95.12(18) | O(2)-Co(2)-O(8)#4   | 114.74(17) |
| O(1)-Co(1)-O(5)#1                                                                                                                                      | 95.12(18) | O(2)-Co(2)-O(8)#3   | 114.74(17) |
| O(1)-Co(1)-O(7)#3                                                                                                                                      | 103.3(2)  |                     |            |
| Symmetry code: #1 -x+1,-y+1,-z+2; #2 y,x,-z+2; #3 -x+y+1/3,-x+2/3,z-1/3; #4 x+1/3,x-y+2/3,z-1/3; #5 -y+2/3,x-y+1/3,z+1/3; #6 -y+1,-x+1,z for Co-MOF 1. |           |                     |            |
| <b>Co-MOF 2</b>                                                                                                                                        |           |                     |            |
| Co(1)-O(3)                                                                                                                                             | 2.093(3)  | Co(2)-O(15)         | 2.083(3)   |
| Co(1)-O(4)                                                                                                                                             | 2.084(3)  | Co(3)-O(2)          | 2.136(3)   |
| Co(1)-O(5)                                                                                                                                             | 2.096(3)  | Co(3)-O(2)#1        | 2.136(3)   |
| Co(1)-O(6)#1                                                                                                                                           | 2.145(3)  | Co(3)-O(3)          | 2.057(2)   |
| Co(1)-O(10)#2                                                                                                                                          | 2.087(3)  | Co(3)-O(3)#1        | 2.057(2)   |

|                      |            |                      |            |
|----------------------|------------|----------------------|------------|
| Co(1)-O(16)          | 2.111(3)   | Co(3)-O(17)          | 2.136(3)   |
| Co(2)-O(1)           | 2.060(3)   | Co(3)-O(17)#1        | 2.136(3)   |
| Co(2)-O(3)           | 2.080(3)   | Co(4)-O(4)           | 1.976(3)   |
| Co(2)-O(4)           | 2.138(3)   | Co(4)-O(9)#2         | 1.993(3)   |
| Co(2)-O(7)#1         | 2.114(3)   | Co(4)-O(11)#3        | 1.977(3)   |
| Co(2)-O(14)          | 2.115(3)   | Co(4)-O(13)#4        | 2.019(3)   |
| O(3)-Co(1)-O(5)      | 96.22(10)  | O(14)-Co(2)-O(4)     | 176.15(12) |
| O(3)-Co(1)-O(6)#1    | 87.11(11)  | O(15)-Co(2)-O(4)     | 96.95(12)  |
| O(3)-Co(1)-O(16)     | 87.99(11)  | O(15)-Co(2)-O(7)#1   | 88.36(13)  |
| O(4)-Co(1)-O(3)      | 87.25(10)  | O(15)-Co(2)-O(14)    | 86.72(13)  |
| O(4)-Co(1)-O(5)      | 89.92(11)  | O(2)-Co(3)-O(2)#1    | 180.00(7)  |
| O(4)-Co(1)-O(6)#1    | 85.15(12)  | O(2)-Co(3)-O(17)     | 89.72(11)  |
| O(4)-Co(1)-O(10)#2   | 97.13(11)  | O(2)-Co(3)-O(17)#1   | 90.28(11)  |
| O(4)-Co(1)-O(16)     | 173.75(12) | O(2)#1-Co(3)-O(17)   | 90.28(11)  |
| O(5)-Co(1)-O(6)#1    | 173.93(13) | O(2)#1-Co(3)-O(17)#1 | 89.72(11)  |
| O(5)-Co(1)-O(16)     | 94.62(13)  | O(3)-Co(3)-O(2)      | 95.68(10)  |
| O(10)#2-Co(1)-O(3)   | 175.46(11) | O(3)#1-Co(3)-O(2)    | 84.32(10)  |
| O(10)#2-Co(1)-O(5)   | 85.01(11)  | O(3)#1-Co(3)-O(2)#1  | 95.68(10)  |
| O(10)#2-Co(1)-O(6)#1 | 92.06(12)  | O(3)-Co(3)-O(2)#1    | 84.32(10)  |
| O(10)#2-Co(1)-O(16)  | 87.56(12)  | O(3)-Co(3)-O(3)#1    | 180        |
| O(16)-Co(1)-O(6)#1   | 90.56(14)  | O(3)-Co(3)-O(17)     | 93.88(10)  |
| O(1)-Co(2)-O(3)      | 93.63(11)  | O(3)#1-Co(3)-O(17)   | 86.12(10)  |
| O(1)-Co(2)-O(4)      | 86.97(12)  | O(3)#1-Co(3)-O(17)#1 | 93.88(10)  |
| O(1)-Co(2)-O(7)#1    | 173.54(12) | O(3)-Co(3)-O(17)#1   | 86.12(10)  |
| O(1)-Co(2)-O(14)     | 94.34(14)  | O(17)-Co(3)-O(17)#1  | 180.00(15) |
| O(1)-Co(2)-O(15)     | 88.10(13)  | O(4)-Co(4)-O(9)#2    | 111.22(11) |
| O(3)-Co(2)-O(4)      | 86.19(10)  | O(4)-Co(4)-O(11)#3   | 109.52(14) |
| O(3)-Co(2)-O(7)#1    | 90.19(11)  | O(4)-Co(4)-O(13)#4   | 128.22(13) |
| O(3)-Co(2)-O(14)     | 90.11(11)  | O(9)#2-Co(4)-O(13)#4 | 100.01(12) |
| O(3)-Co(2)-O(15)     | 176.50(13) | O(11)#3-Co(4)-O(9)#2 | 93.71(13)  |
| O(7)#1-Co(2)-O(4)    | 88.10(11)  | O(11)#3-Co(4)-       | 108.43(14) |
| O(7)#1-Co(2)-O(14)   | 90.86(13)  | O(13)#4              |            |

Symmetry code: #1  $-x+1/2, -y+3/2, -z+1$ ; #2  $-x+1/2, -y+5/2, -z+1$ ; #3  $-x+1/2, y+1/2, -z+1/2$ ; #4  $x-1/2, -y+3/2, z-1/2$ ; #5  $-x+1/2, y-1/2, -z+1/2$ ; #6  $x+1/2, -y+3/2, z+1/2$  for Co-MOF **2**.

**Table S2.** A comparison of various MOF materials used for selective adsorption for C<sub>2</sub>H<sub>2</sub> and CO<sub>2</sub> over CH<sub>4</sub>.

| MOF materials                                                                                                                                                            | IAST calculated selectivity                    |                                  | Ref. |
|--------------------------------------------------------------------------------------------------------------------------------------------------------------------------|------------------------------------------------|----------------------------------|------|
|                                                                                                                                                                          | C <sub>2</sub> H <sub>2</sub> /CH <sub>4</sub> | CO <sub>2</sub> /CH <sub>4</sub> |      |
| [(CH <sub>3</sub> ) <sub>2</sub> NH <sub>2</sub> ][Zn <sub>1.5</sub> (μ <sub>3</sub> -O) <sub>0.5</sub> (F-tzba) <sub>1.25</sub> (bpy) <sub>0.25</sub> (μ <sub>2</sub> - | 14.4                                           | 4.2                              | 22a  |

|                                                                                                                                                     |       |       |           |
|-----------------------------------------------------------------------------------------------------------------------------------------------------|-------|-------|-----------|
| F) <sub>0.5</sub> ·2DMF·2H <sub>2</sub> O                                                                                                           |       |       |           |
| {[(Me <sub>2</sub> NH <sub>2</sub> ) <sub>0.5</sub> ][Cu <sub>0.75</sub> (L) <sub>0.5</sub> (DMA) <sub>0.375</sub> ·H <sub>2</sub> O]} <sub>n</sub> |       | 8.3   | 22d       |
| {[Cu <sub>4</sub> (L) <sub>2</sub> (H <sub>2</sub> O) <sub>4</sub> ]·4DMF·8H <sub>2</sub> O} <sub>n</sub>                                           |       | 3.2   | 22d       |
| {[Cu <sub>4</sub> (L) <sub>2</sub> (ATZ) <sub>2</sub> (H <sub>2</sub> O)]·5DMF·5H <sub>2</sub> O} <sub>n</sub>                                      |       | 7.2   | 22d       |
| ZJNU-26                                                                                                                                             | 19    | 4.3   | 23a       |
| Sc-ABTC                                                                                                                                             | 14.7  |       | 23b       |
| {[Co <sub>6</sub> (μ <sub>3</sub> -OH) <sub>4</sub> (Ina) <sub>8</sub> ](H <sub>2</sub> O) <sub>10</sub> (DMA) <sub>2</sub> } <sub>n</sub>          | 9.6   |       | 22c       |
| ZJU-19                                                                                                                                              | 42.2  | 6.4   | 23c       |
| MOF-505                                                                                                                                             | ~8.9  |       | 23d       |
| ZJNU-15                                                                                                                                             | 37.7  | 5.0   | 23e       |
| ZJNU-119                                                                                                                                            | 62.9  | 28.6  | 22b       |
| NOTT-108                                                                                                                                            | ~6.3  |       | 23d       |
| HNUST-2                                                                                                                                             | ~4.3  |       | 23d       |
| <b>Co-MOF 1</b>                                                                                                                                     | 25.43 | 11.33 | This work |
| <b>Co-MOF 2</b>                                                                                                                                     | 32.71 | 11.42 | This work |

**Table S3.** Results of the ICP analyses obtained for MOF materials of Co-MOF 1-2.

|          | Total sample quality( mg ) | The expected amount of Li <sup>+</sup> ion ( ppm ) | The expected amount of Zn <sup>2+</sup> ion ( ppm ) | The ratio of Li <sup>+</sup> :Zn <sup>2+</sup> in sample | The expected ratio in cation exchange with Li <sup>+</sup> |
|----------|----------------------------|----------------------------------------------------|-----------------------------------------------------|----------------------------------------------------------|------------------------------------------------------------|
| Co-MOF 1 | 6.10                       | 0.397                                              | 4.50                                                | 1 : 11.34                                                | 1 : 8.48                                                   |
| Co-MOF 2 | 6.38                       | 0.37                                               | 11.6                                                | 1 : 31.35                                                | 1 : 29.71                                                  |

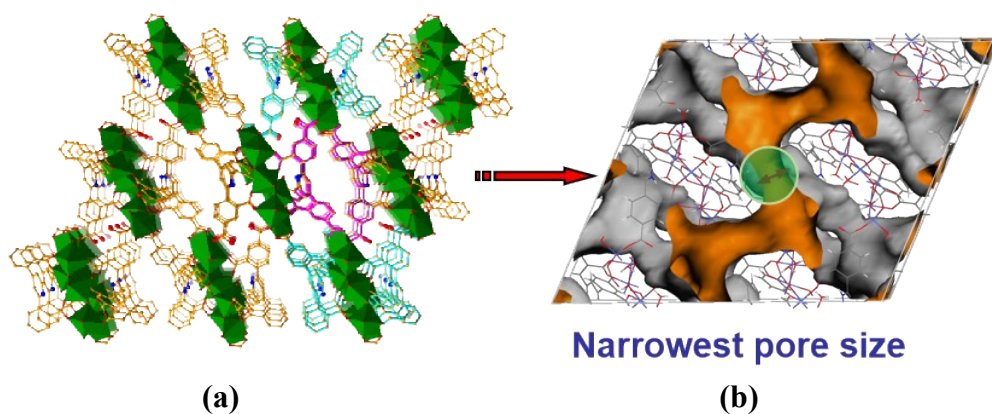

**Figure S1.** (a) The linkage of the Co<sub>7</sub>(COO)<sub>12</sub> cluster with eight adjacent cores; (b) A

channel diagram distorted in the b-direction of Co-MOF 2.

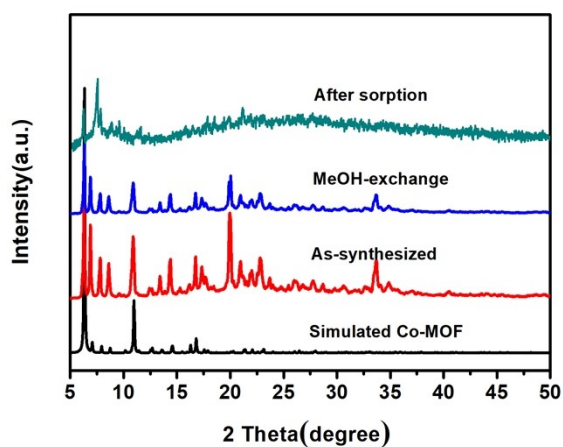

(a)

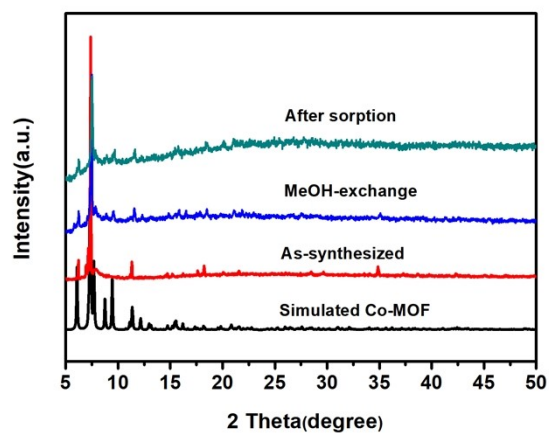

(b)

**Figure S2.** (a) and (b) correspond to the PXRD patterns for Co-MOF 1 and Co-MOF 2: simulated, as-synthesized, exchanged and activated samples.

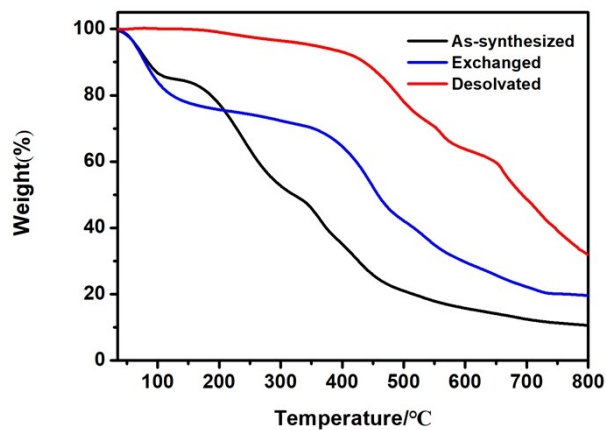

(a)

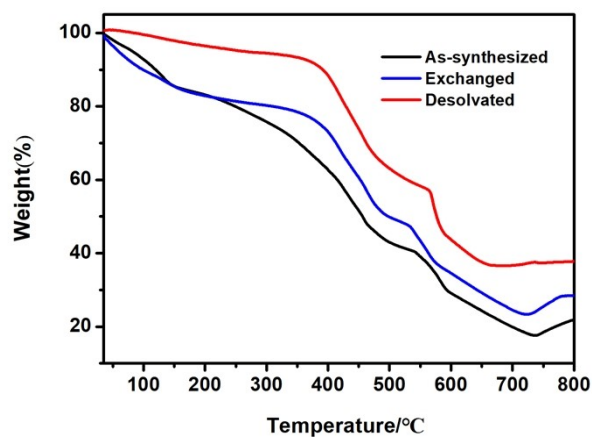

(b)

**Figure S3.** (a) and (b) correspond to the TGA for Co-MOF 1 and Co-MOF 2: as-synthesized, exchanged and desolvated samples.

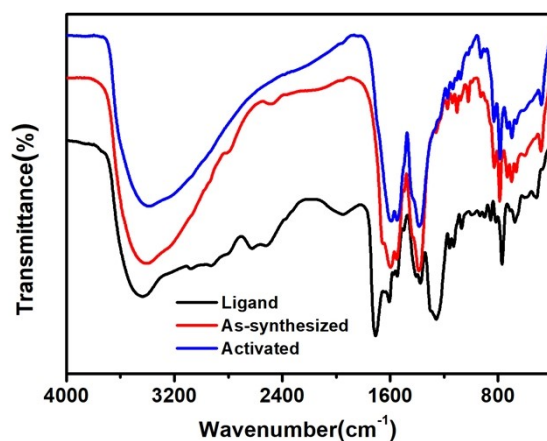

(a)

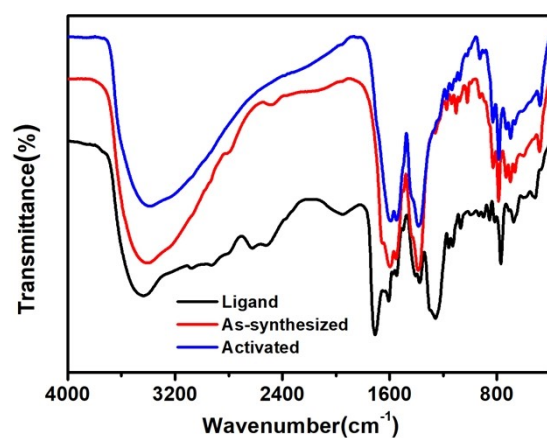

(b)

**Figure S4.** (a) and (b) correspond to the Infrared Spectra of H<sub>6</sub>tdp ligand, as-

synthesized and activated samples of Co-MOF 1 and Co-MOF 2.

### IAST adsorption selectivity calculation

The experimental isotherm data for pure C<sub>2</sub>H<sub>2</sub>, CO<sub>2</sub>, C<sub>2</sub>H<sub>4</sub>, and CH<sub>4</sub> (measured at 298 K) were fitted using a Langmuir-Freundlich (L-F) model.

$$q = \frac{a * b * p^c}{1 + b * p^c}$$

Where  $q$  and  $p$  are adsorbed amounts and pressures of component  $i$ , respectively. The adsorption selectivities for binary mixtures of C<sub>2</sub>H<sub>2</sub>/CH<sub>4</sub>, C<sub>2</sub>H<sub>4</sub>/CH<sub>4</sub>, CO<sub>2</sub>/CH<sub>4</sub> at 273 and 298 K, defined by

$$S_{ads} = (q_1 / q_2) / (p_1 / p_2)$$

Where  $q_i$  is the amount of  $i$  adsorbed and  $p_i$  is the partial pressure of  $i$  in the mixture.

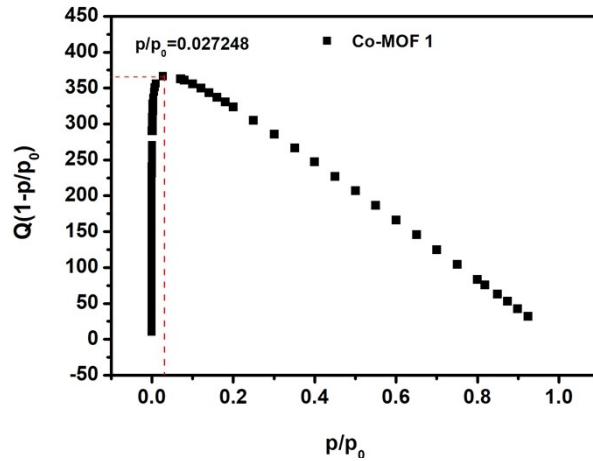

(a)

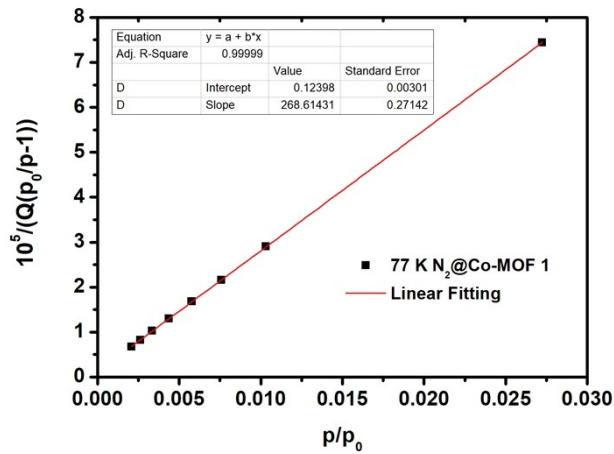

(b)

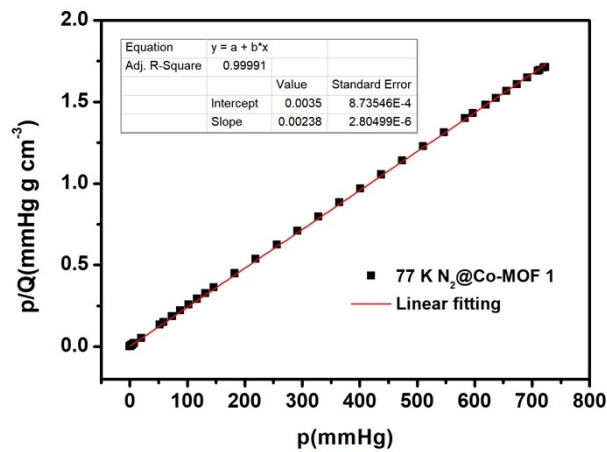

(c)

$$S_{\text{BET}} = 1 / (0.124 \times 10^{-6} + 268.61) \times 10^5 / 22414 \times 6.023 \times 10^{23} \times 0.162 \times 10^{-18} = 1620.64 \text{ m}^2 \text{ g}^{-1}$$

$$S_{\text{Langmuir}} = (1 / 0.00238) / 22414 \times 6.023 \times 10^{23} \times 0.162 \times 10^{-18} = 1829.08 \text{ m}^2 \text{ g}^{-1}$$

$$\text{BET constant } C = 1 + 268.61 / 0.124 \times 10^5 \times 10^{-6} = 217.62$$

$$(P/P_0)_{\text{nm}} = \frac{1}{\sqrt{C} + 1} = 0.063484$$

**Figure S5.** (a) The consistency plot, (b) BET surface area plot, and (c) Langmuir surface area plot for Co-MOF 1.

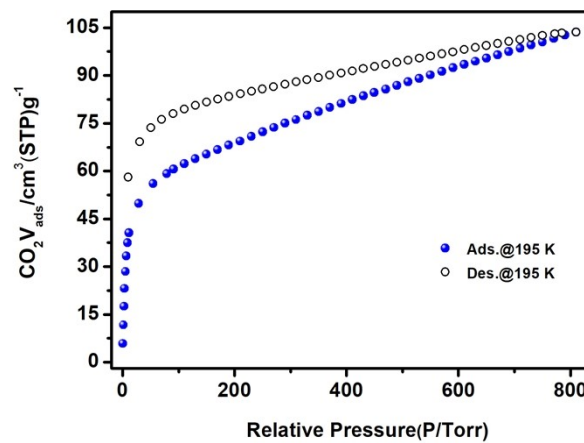

**Figure S6.** CO<sub>2</sub> adsorption and desorption isotherm curves of Co-MOF 2 at 195 K.

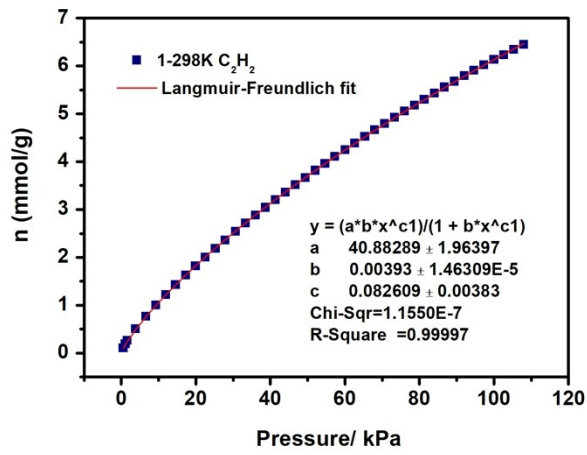

(a)

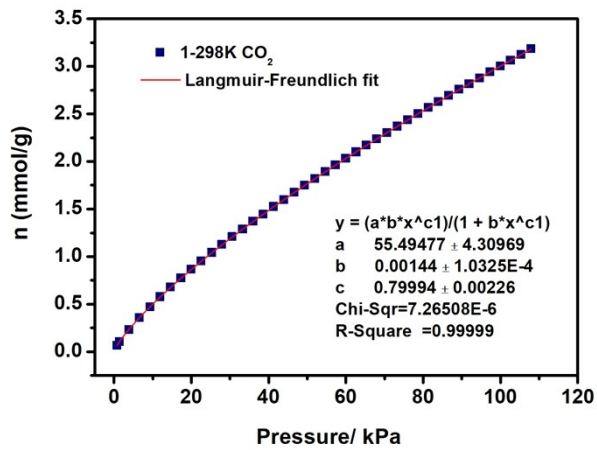

(b)

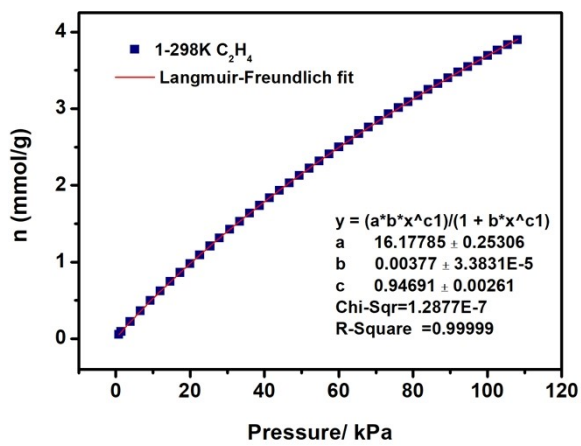

(c)



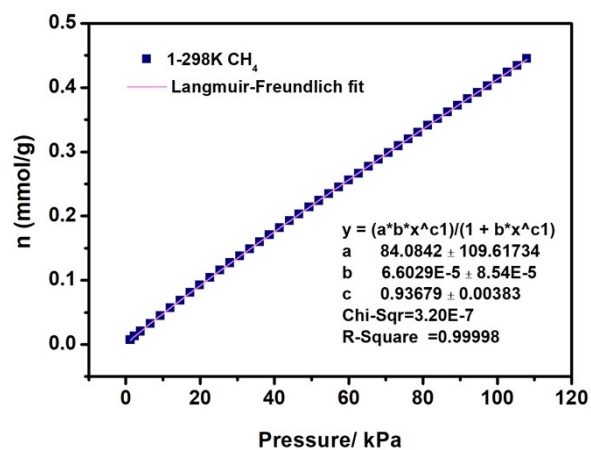

(d)

**Figure S7.** (a), (b), (c) and (d) correspond to the C<sub>2</sub>H<sub>2</sub>, CO<sub>2</sub>, C<sub>2</sub>H<sub>4</sub>, CH<sub>4</sub> adsorption isotherms of Co-MOF **1** at 298 K with fitting by L-F model.

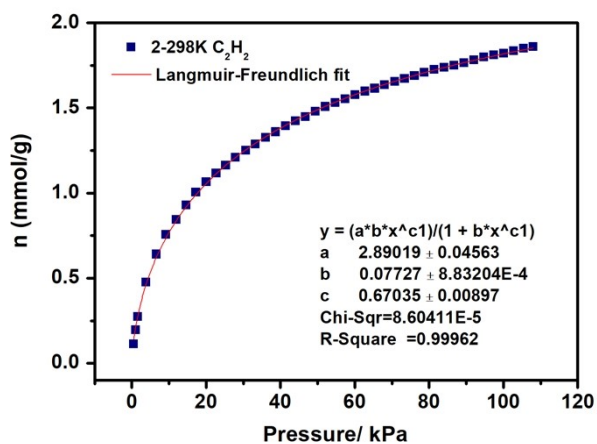

(a)

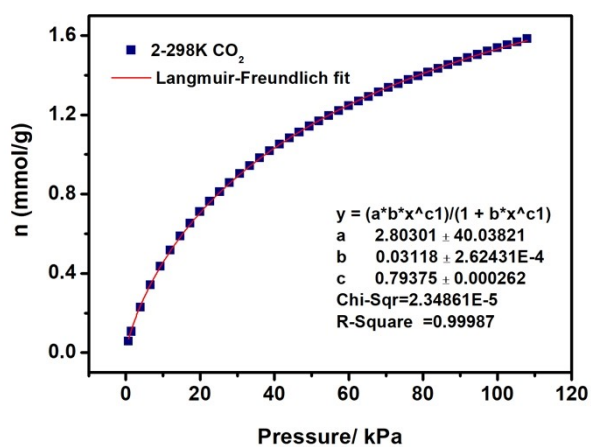

(b)

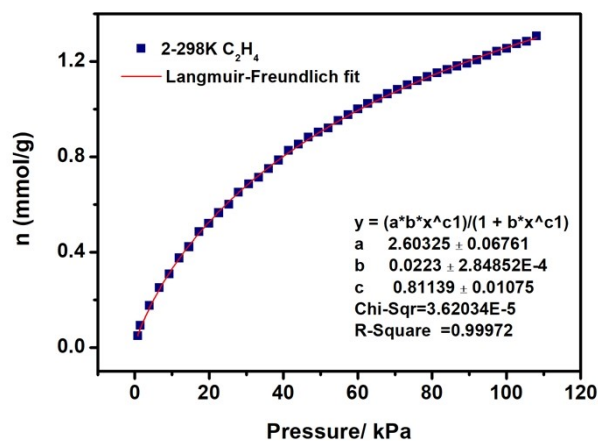

(c)

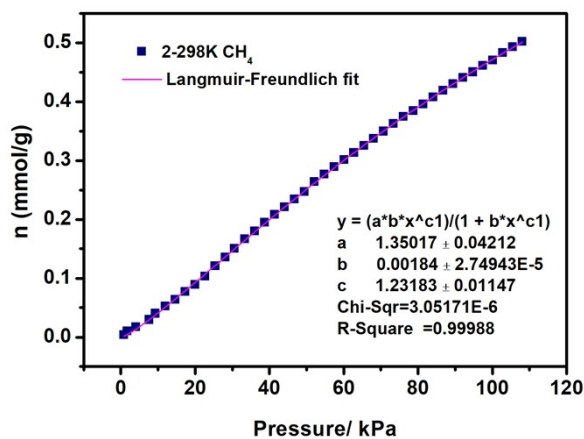

(d)

**Figure S8.** (a), (b), (c) and (d) correspond to the  $C_2H_2$ ,  $CO_2$ ,  $C_2H_4$ ,  $CH_4$  isotherms of Co-MOF **2** at 298 K with fitting by L-F model.

#### Calculation of sorption heat for $C_2H_2$ and $CO_2$ uptakes using Virial II model

The above equation was applied to fit the  $C_2H_2$ ,  $C_2H_4$  and  $CO_2$  adsorption isotherm data for desolvated Co-MOF **1** and Co-MOF **2** at 273 and 298 K, where  $P$  is the pressure,  $N$  is the adsorbed amount,  $T$  is the temperature,  $a_i$  and  $b_i$  are virial coefficients, and  $m$  and  $n$  are the number of coefficients used to describe the isotherms.  $Q_{st}$  is the coverage-dependent enthalpy of adsorption and  $R$  is the universal gas constant.

$$\ln P = \ln N + 1/T \sum_{i=0}^m a_i N^i + \sum_{i=0}^n b_i N^i Q_{st} = -R \sum_{i=0}^m a_i N^i$$

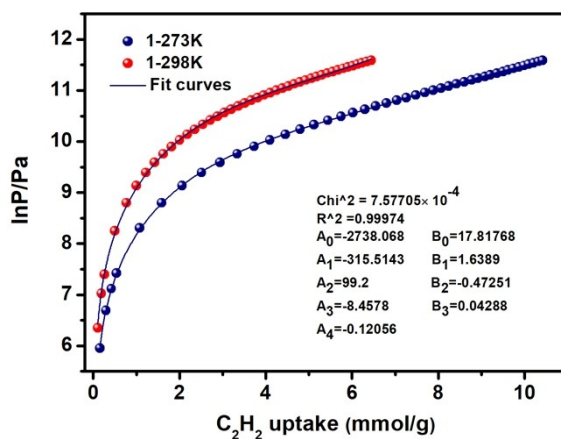

(a)

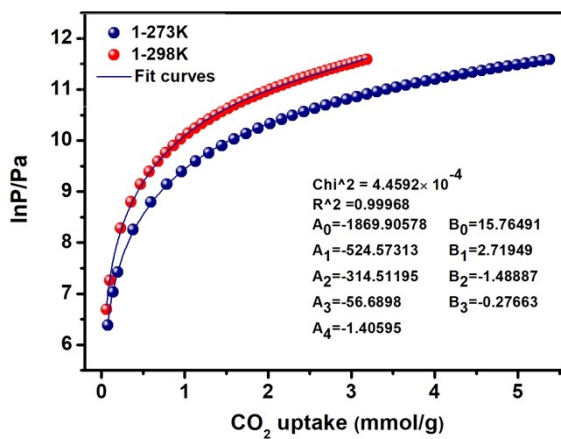

(b)

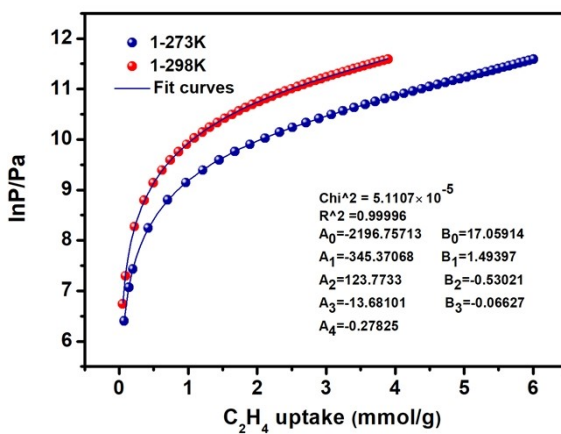

(c)

**Figure S9.** (a), (b) and (c) correspond to the Virial analysis of the  $C_2H_2$ ,  $CO_2$ ,  $C_2H_4$  adsorption data at 298 K and 273 K for Co-MOF 1.

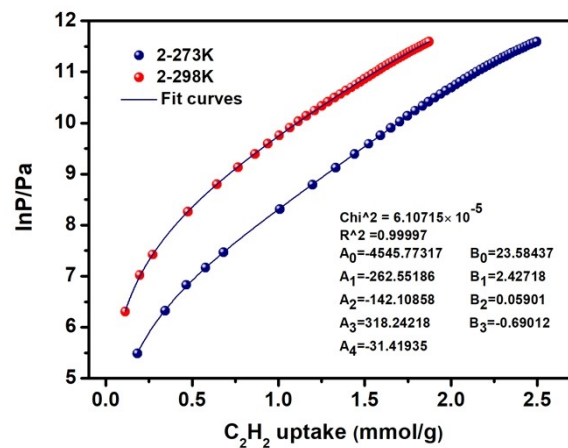

(a)

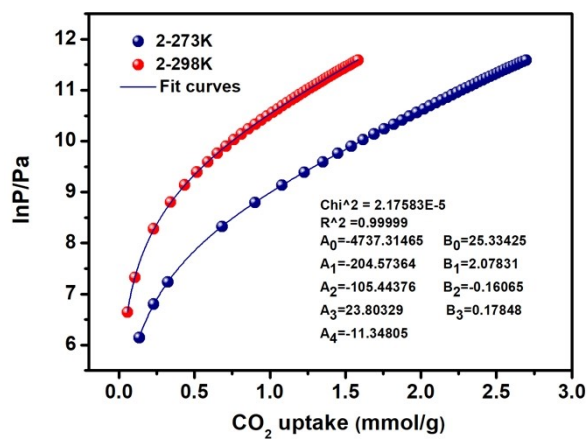

(b)

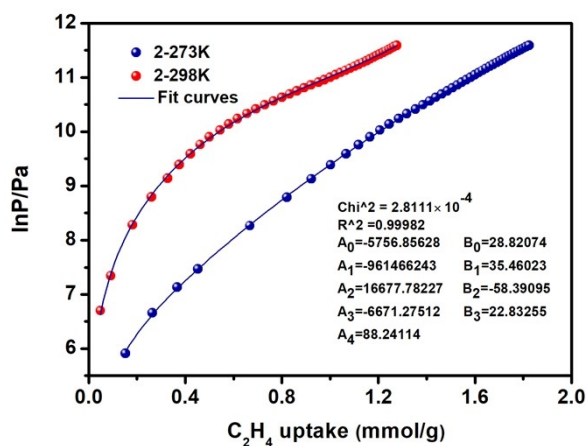

(c)

**Figure S10.** (a), (b) and (c) correspond to the Virial analysis of the  $\text{C}_2\text{H}_2$ ,  $\text{CO}_2$ ,  $\text{C}_2\text{H}_4$  adsorption data at 298 K and 273 K for Co-MOF 2.
